# Supplementary material for: Surface ligand chemistry on quaternary Ag(InxGa1−x)S2 semiconductor quantum dots for improving photoluminescence properties
Source: Nanoscale Adv. 2021 Dec 10;4(3):849–57. doi: 10.1039/d1na00684c (PMC9419514; doi:10.1039/d1na00684c)
Supplement: NA-004-D1NA00684C-s001 [file NA-004-D1NA00684C-s001.pdf]

## Electric Supplementary Information

### Surface Ligand Chemistry on Quaternary $\text{Ag}(\text{In}_x\text{Ga}_{1-x})\text{S}_2$ Semiconductor

### Quantum Dots for Improving Photoluminescence Properties

**Authors:** Watcharaporn Hoisang,<sup>1</sup> Taro Uematsu,<sup>1,2\*</sup> Tsukasa Torimoto,<sup>3</sup> and Susumu Kuwabata<sup>1,2\*</sup>

**Affiliations:**

<sup>1</sup> Department of Applied Chemistry, Graduate School of Engineering, Osaka University, 2-1 Yamada-oka, Suita, Osaka 565-0871, Japan

<sup>2</sup> Innovative Catalysis Science Division, Institute for Open and Transdisciplinary Research Initiatives (ICS-OTRI), Graduate School of Engineering, Osaka University, 2-1 Yamada-oka, Suita, Osaka 565-0871, Japan

<sup>3</sup> Department of Materials Chemistry, Graduate School of Engineering, Nagoya University, Chikusa-ku, Nagoya 464-8603, Japan

Correspondence: Taro Uematsu (t-uematsu@chem.eng.osaka-u.ac.jp) and Susumu Kuwabata (kuwabata@chem.eng.osaka-u.ac.jp)

### ***Synthesis of gallium diethyldithiocarbamate***

Gallium diethyldithiocarbamate [Ga(DDTC)<sub>3</sub>] was prepared through a method taken from the literature, which was subsequently modified.<sup>1</sup> A 50 mL volume of an aqueous solution of 0.3 M NaDDTC was added dropwise into 50 mL of an aqueous solution of 0.1 M Ga(NO<sub>3</sub>)<sub>3</sub>. A white precipitate was formed immediately. The solution was stirred at room temperature for 2 h. The product obtained was filtered, washed with deionized water, and dried in a vacuum oven at room temperature overnight.

### ***Synthesis of zinc oleate***

Zinc oleate (Zn[OA]<sub>2</sub>) was synthesized using the following procedure.<sup>2</sup> ZnO (1.66 g) was mixed with excess oleic acid (13.6 g) in a two-neck round-bottomed flask. The solution was subsequently degassed and heated to 260°C in an argon atmosphere. The solution was cooled down to ambient temperature; the product was then purified with toluene/acetone. The white solid Zn(OA)<sub>2</sub> was finally dried and kept at room temperature.

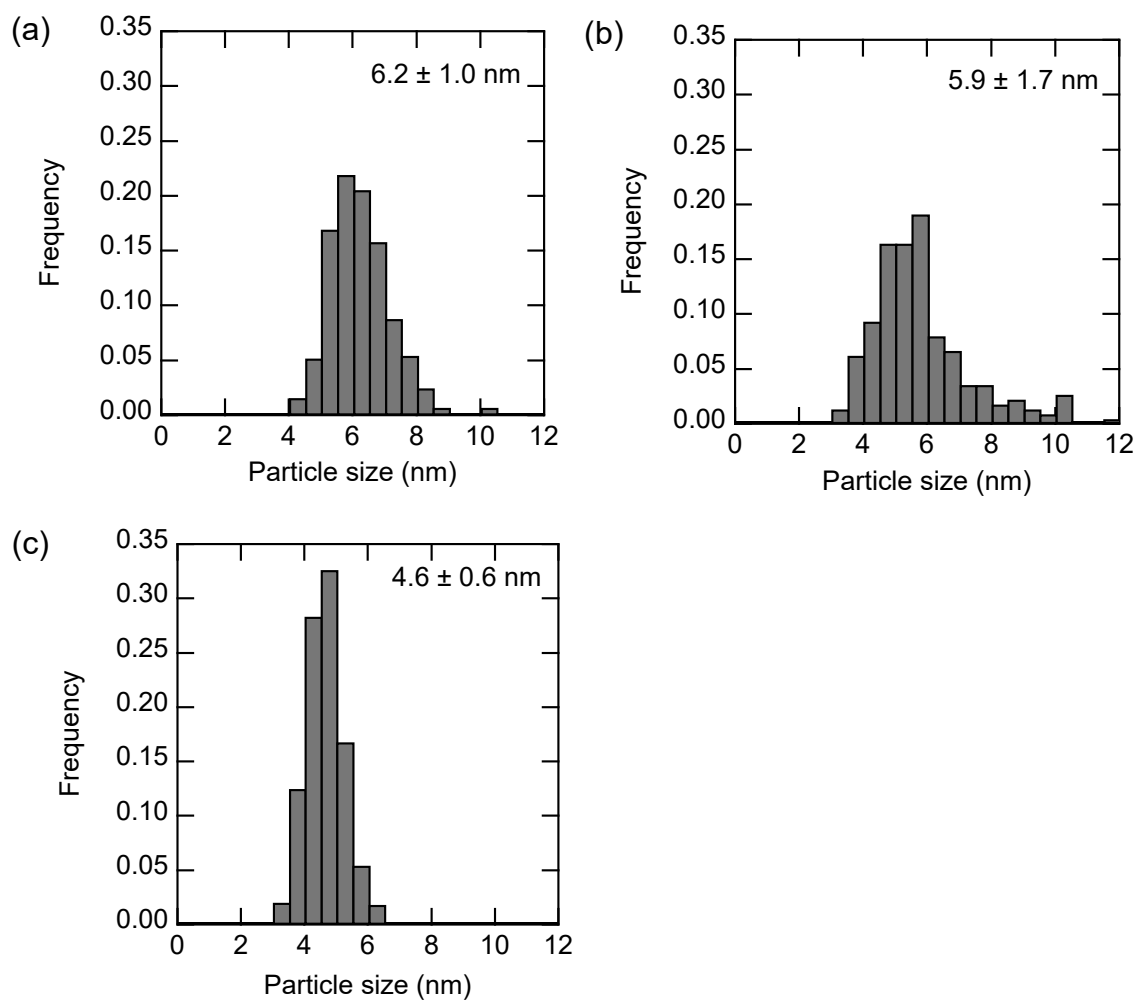

**Fig. S1** Corresponding size distributions of Fig. 1(a–c) for the as-synthesized AIGS QDs in different solvents: (a) OLA, (b) OLA:OA = 2:1, and (c) OLA:OA = 1:2.

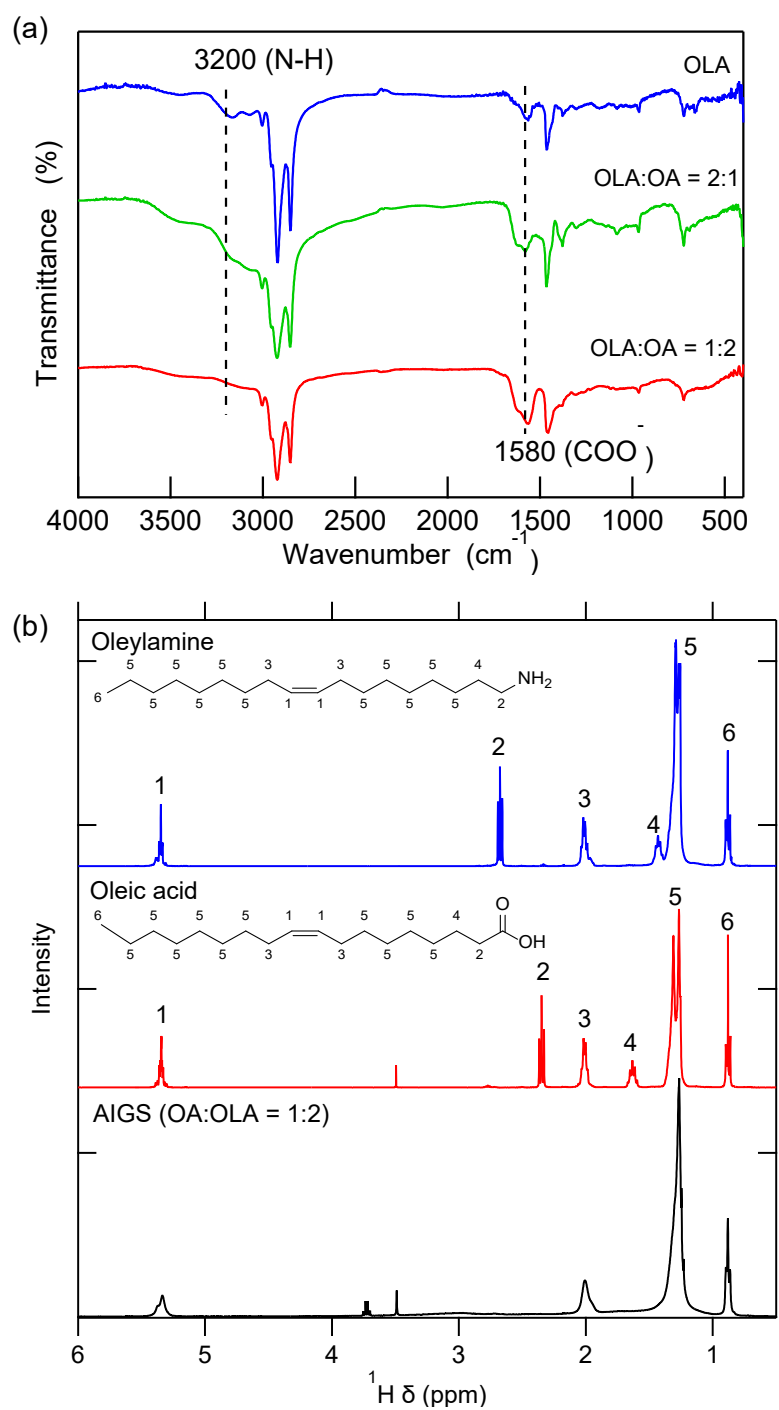

**Fig. S2** (a) FT-IR spectra of the AIGS QDs synthesized with OLA only and an OLA:OA mixture (with ratios 2:1 and 1:2). (b) <sup>1</sup>H NMR spectra (chloroform-d) of free OLA and OA as well as of AIGS QDs synthesized in an OLA:OA mixture solvent (2:1).

**Equation 1** The multiexponential function for the PL decay calculation is

$$I(t) = \sum_i A_i \exp\left(-\frac{t}{\tau_i}\right), \quad (1)$$

where  $I(t)$ ,  $A_i$ , and  $\tau_i$  are the decay curve, amplitude, and lifetime, respectively. This equation is used for calculating the data in Table S1 and S2.

**Table S1** Fitted PL lifetime components derived from the triexponential function ( $I(t) = A_1 \exp(-t/\tau_1) + A_2 \exp(-t/\tau_2) + A_3 \exp(-t/\tau_3)$ ) of the AIGS QDs corresponding to Fig. 1f.

| AIGS         | $\langle\tau_{av}\rangle$<br>(ns) | $\tau_1$<br>(ns) | $A_1$ | $\tau_2$<br>(ns) | $A_2$ | $\tau_3$<br>(ns) | $A_3$ | $\chi^2$ |
|--------------|-----------------------------------|------------------|-------|------------------|-------|------------------|-------|----------|
| OLA          | 262.6                             | 23.9             | 0.41  | 144.8            | 0.43  | 405.4            | 0.17  | 1.04     |
| OLA:OA = 2:1 | 603.4                             | 33.9             | 0.18  | 249.1            | 0.41  | 734.2            | 0.41  | 1.02     |
| OLA:OA = 1:2 | 1042.8                            | 72.2             | 0.18  | 512.1            | 0.57  | 1487.8           | 0.25  | 1.06     |

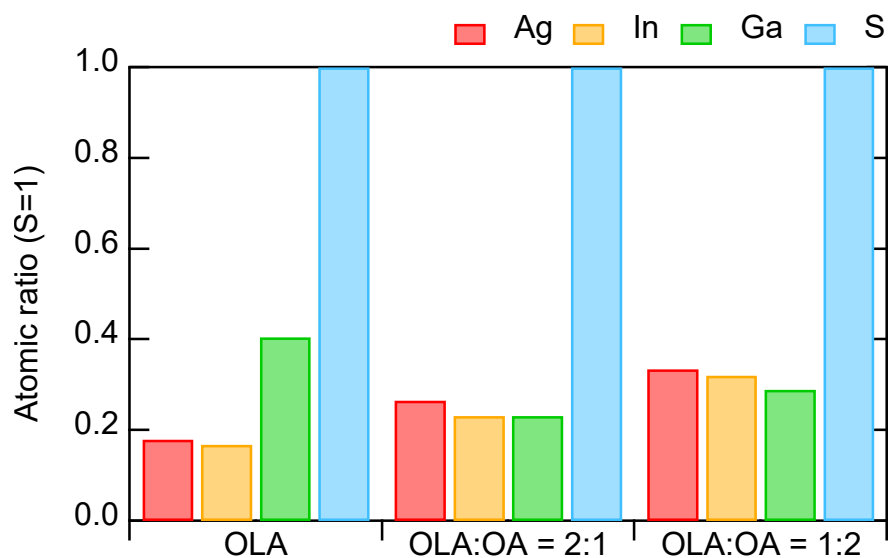

**Fig. S3** Atomic ratios (sulfur basis) obtained via the EDX–SEM analysis for the AIGS QDs synthesized with various surface ligands.

**Table S2** Fitted PL lifetime components of the AIGS QDs corresponding to Fig. 3b.

| AIGS             | $\langle\tau_{av}\rangle$<br>(ns) | $\tau_1$<br>(ns) | $A_1$ | $\tau_2$<br>(ns) | $A_2$ | $\tau_3$<br>(ns) | $A_3$ | $\chi^2$ |
|------------------|-----------------------------------|------------------|-------|------------------|-------|------------------|-------|----------|
| Before treatment | 603.4                             | 33.9             | 0.18  | 249.1            | 0.41  | 734.2            | 0.41  | 1.02     |
| After treatment  | 691.7                             | 34.1             | 0.17  | 328.3            | 0.50  | 903.8            | 0.33  | 1.02     |

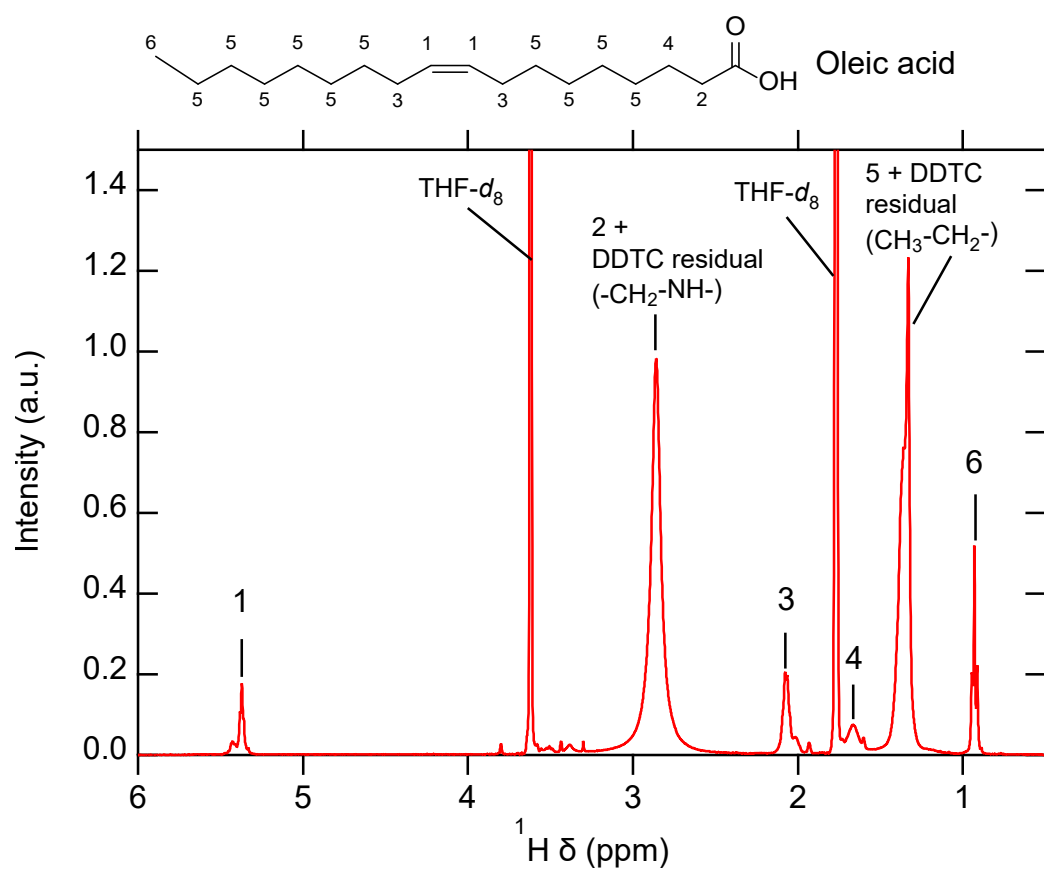

**Fig. S4** (a) <sup>1</sup>H NMR spectra (THF-*d*<sub>8</sub>) of the white precipitate that was generated after the ZnCl<sub>2</sub> treatment of the AIGS QDs synthesized in the OLA:OA mixture solvent (with ratio 2:1).

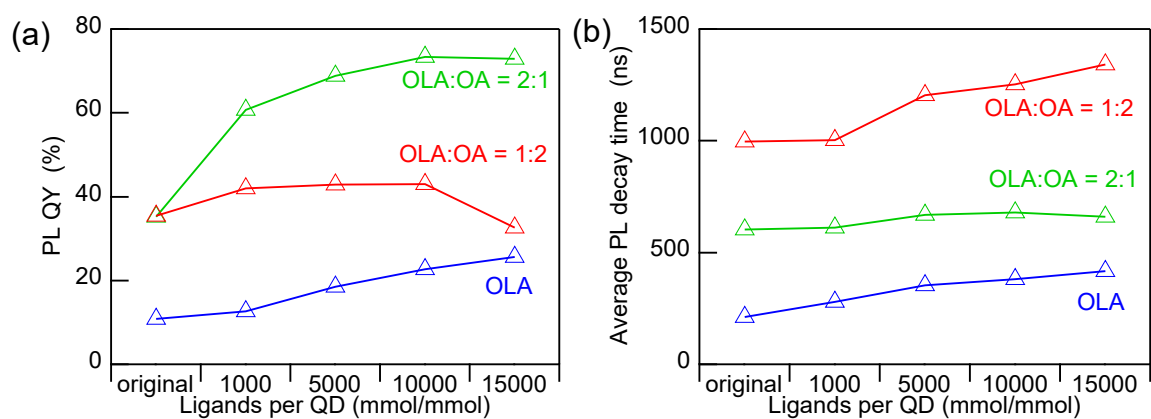

**Fig. S5** Change in (a) the PL QY values and (b) the average PL decay times of the AIGS QDs synthesized using various ligands (OLA, OLA:OA = 2:1, and OLA:OA = 1:2) before and after the  $\text{ZnCl}_2$  treatment at 1,000–15,000 ligands/QD.

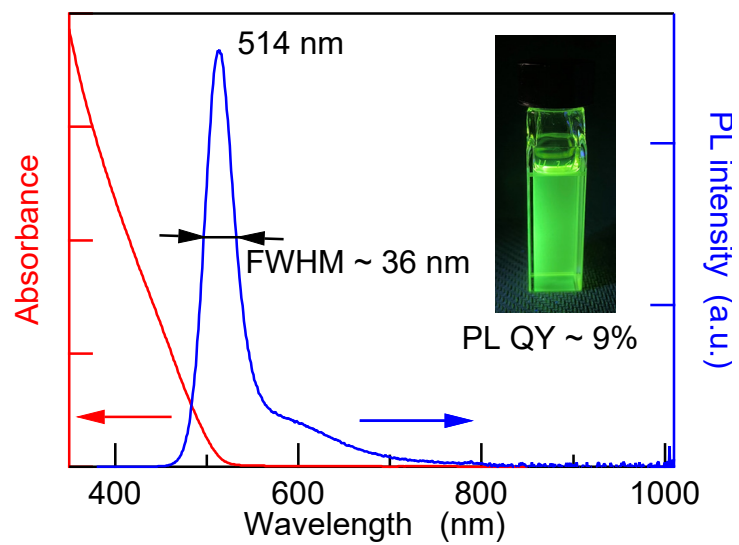

**Fig. S6** UV–vis absorption and PL spectra of the AIGS/GaS<sub>y</sub> core/shell-like QDs with the inset photograph showing the QD solution under UV radiation (365 nm); the photographed QD solution has a PL QY of approximately 9%, as labeled in the figure.

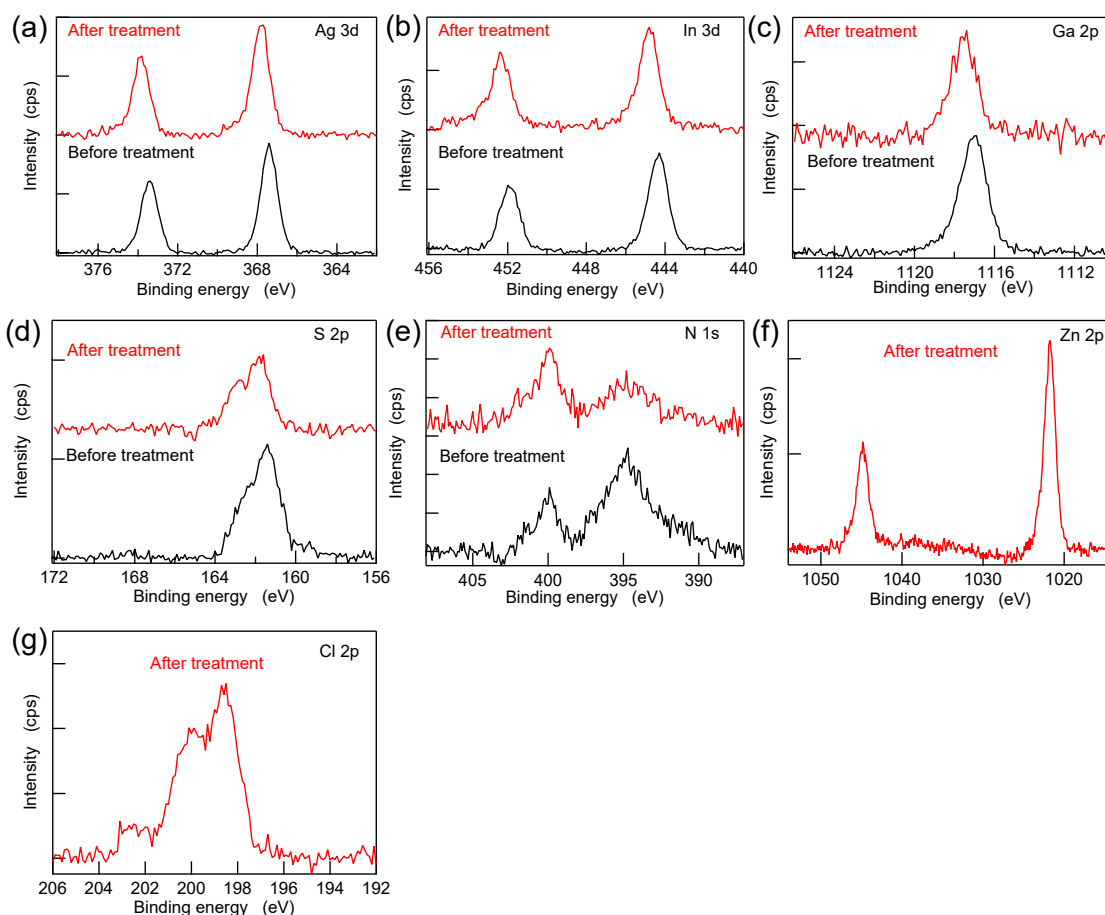

**Fig. S7** XPS spectra of the AIGS/GaS<sub>y</sub> core/shell-like QDs before (black curves) and after (red curves) the ZnCl<sub>2</sub> treatment: (a) Ag 3d, (b) In 3d, (c) Ga 2p, (d) S 2p, (e) N 1s, (f) Zn 2p, and (g) Cl 2p.

## References

1. T. X. Wang, H. Xiao and Y. C. Zhang, *Mater. Lett.*, 2008, **62**, 3736-3738.
2. T. Yao, Q. Zhao, Z. Qiao, F. Peng, H. Wang, H. Yu, C. Chi and J. Yang, *Chemistry*, 2011, **17**, 8663-8670.
